# Supplementary material for: Gut Microbiota-Based Algorithms in the Prediction of Metachronous Adenoma in Colorectal Cancer Patients Following Surgery
Source: Front Microbiol. 2020 Jun 12;11:1106. doi: 10.3389/fmicb.2020.01106 (PMC7303296; doi:10.3389/fmicb.2020.01106)
Supplement: Supplementary file 3 [file Table_1.xlsx]

## Sheet: Discovery cohort
Clinico-pathological Characteristics of Discovery Cohort Patients.
		General information			Samples type			Complications			Tumor									Others
Group	ID	Gender	Age	BMI	On-tumor mucosal	Fecal	Off-tumor mucosal	Synchronous adenoma	Bowel obstruction	Hematochezia	Primary site	Tumor size (cm)	Distance from anus (cm)	T-stage	N-stage	M-stage	Dukes	Stage	CEA	CA19-9	Adjuvant therapy
MA	CR0M053	M	66	28.4	Y	N	Y	Y	N	N	splenic flexure	2.5	75	3	0	0	B	IIA	6.55	8.96	C
MA	CR0F086	F	52	25.7	Y	N	N	N	N	Y	rectum	3	12	2	0	0	A	I	0.72	7.33	C
MA	R00F092	F	73	25.4	Y	Y	Y	Y	N	Y	rectum	8	18	3	0	0	B	IIA	6.9	7.13	No
MA	CR0M094	M	58	29.3	Y	N	Y	Y	N	N	ascending	4	83	3	0	0	B	IIA	7.97	34.5	C
MA	CR0M114	M	55	25.1	Y	N	Y	Y	N	N	splenic flexure	3.9	70	3	0	0	B	IIA	1.55	3.48	C
MA	R00F122	F	69	22.6	Y	N	Y	Y	Y	N	rectum	4.2	10	3	0	0	B	IIA	15.65	129.8	No
MA	R00M134	M	73	24.9	Y	N	Y	Y	N	Y	rectum	4.2	10	3	0	0	B	IIA	1.88	7.03	No
MA	R00M179	M	63	19.5	Y	Y	N	N	N	Y	sigmoid	3.5	10	3	1b	0	C1	IIIB	17.48	146.87	C
MA	CR0F180	F	65	22.6	Y	Y	N	Y	N	N	ascending	6.5	75	3	0	0	B	IIA	10.93	142.6	C
MA	CR0F194	F	69	22.1	Y	Y	N	Y	N	N	descending	4	55	3	0	0	B	IIA	2.28	7.12	No
MA	R00F199	F	68	21.1	Y	N	N	N	N	N	rectum	3	6	3	1a	0	C1	IIIB	14.58	271.1	C
MA	R00M208	M	60	29.4	Y	Y	N	Y	N	Y	rectum	3.5	10	3	0	0	B	IIA	2.68	0.6	C
MA	R00M213	M	60	26	Y	N	N	Y	N	N	rectum	3.9	10	3	0	0	B	IIA	23.45	179.32	C
MA	CL0F217	F	44	32.4	Y	N	N	Y	N	N	rectosigmoid	4	20	3	0	0	B	IIA	1.13	15.12	C
MA	R00F237	F	63	33.6	Y	N	N	Y	Y	N	rectum	4	13	3	0	0	B	IIA	5.92	50.04	C
MA	R00F241	F	47	23.2	Y	N	N	N	N	Y	rectum	5	7	3	0	0	B	IIA	45.49	70.57	No
MA	CL0M254	M	65	26.7	Y	Y	N	N	N	N	rectosigmoid	3.5	38	3	1b	0	C1	IIIB	3.85	14.82	C
MA	CL0F273	F	62	26	Y	N	N	Y	N	Y	rectum	4.2	10	3	0	0	B	IIA	8.12	16.4	No
MA	R00M294	M	77	21.5	Y	Y	N	N	N	Y	rectum	4	3	2	0	0	A	I	17.64	5.92	No
MA	W09 CA	F	62	29.2	Y	Y	N	Y	N	Y	sigmoid	4.3	20	3	0	0	B	IIA	4.54	8.9	C
MA	W01 CA	M	47	24.1	Y	N	N	Y	N	Y	ascending	4	65	3	0	0	B	IIA	0.63	7.2	No
MA	W926 CA	F	77	25	Y	Y	N	N	N	Y	rectum	4.5	6	3	0	0	B	IIA	13.44	9.8	No
MA*	CR0M256	M	63	23.1	N	Y	N	Y	N	N	splenic flexure	7	60	3	1a	0	C1	IIIB	5.89	20.3	C
MA*	R00F259	F	72	25.1	N	Y	N	Y	N	Y	rectum	5	5	3	2a	0	C1	IIIB	3.08	11.56	No
nMA	R00F014	F	71	19.6	Y	N	Y	Y	N	Y	rectum	3.5	25	2	1a	0	C1	IIIA	19.85	0.6	C
nMA	CR0M055	M	57	25.7	Y	Y	N	N	N	N	ileocecal	2	80	3	0	0	B	IIA	2.47	16.63	No
nMA	CL0M067	M	68	27.3	Y	N	Y	N	N	N	rectum	1	14	1	0	0	A	I	1.38	12.55	No
nMA	CR0M074	M	72	23.5	Y	N	N	Y	N	N	ascending	4.1	50	3	0	0	B	IIA	2.32	5.54	No
nMA	R00M075	M	63	21.9	Y	Y	N	N	N	Y	rectum	6	5	3	0	0	B	IIA	9.16	11.78	C
nMA	R00F078	F	54	23.1	Y	N	Y	Y	Y	Y	rectum	4.5	12	3	1b	0	C1	IIIB	40.51	344.5	C
nMA	CR0M088	M	63	18.7	Y	N	Y	N	N	Y	rectum	5	8	3	0	0	B	IIA	2.42	22.32	No
nMA	CRL0M097	M	75	22.2	Y	N	N	Y	N	N	ileocecal	3	70	3	0	0	B	IIA	7.3	10.71	No
nMA	CL0M099	M	62	21.9	Y	N	N	N	N	Y	rectum	6	1	3	1c	0	C2	IIIB	9.16	11.78	C
nMA	R00F111	F	49	23.7	Y	N	Y	Y	N	Y	rectum	4.1	6	3	0	0	B	IIA	1.82	17.44	C
nMA	CL0M118	M	64	24.4	Y	N	N	N	N	N	sigmoid	4	35	3	0	0	B	IIA	2.91	12.27	C
nMA	R00M136	M	52	27.1	Y	N	N	N	N	Y	rectum	3	4	2	0	0	A	I	4.55	4.73	C
nMA	R00M139	M	61	23.7	Y	Y	Y	Y	N	Y	rectum	4	7	3	0	0	B	IIA	27.53	207.46	C+R
nMA	R00M146	M	58	23	Y	N	N	N	N	Y	rectum	6.5	19	3	0	0	B	IIA	1.6	11.26	C
nMA	CR0M168	F	75	22	Y	N	N	N	Y	Y	sigmoid	6	20	3	1a	0	C1	IIIB	41.45	515.5	No
nMA	CL0M223	M	49	20.2	Y	N	N	Y	N	N	transverse	2	45	3	0	0	B	IIA	16.5	17.8	No
nMA	R00F248	F	50	20.3	Y	Y	N	N	N	Y	rectum	3.2	16	3	1c	0	C2	IIIB	3.97	6.4	C
nMA	CL0M255	M	69	23.5	Y	N	N	N	N	N	transverse	4	55	3	0	0	B	IIA	1.56	15.29	C
nMA	CR0F288	F	52	21.6	Y	N	N	N	N	N	ileocecal	4	80	3	1b	0	C1	IIIB	2.41	29.07	C
nMA*	R00M270	M	58	21.3	N	Y	N	N	N	Y	rectum	3.5	8	3	2b	0	C2	IIIC	4.14	5.59	C
nMA*	R00F272	F	49	23.8	N	Y	N	Y	Y	Y	rectum	7	8	3	1b	0	C1	IIIB	19.01	44.41	C
nMA*	W25F02N01	M	22	23.7	N	Y	N	N	N	Y	rectum	4	5	3	1b	0	C1	IIIB	38.43	13.21	C
nMA*	W46F03N01	M	52	25.4	N	Y	N	Y	N	N	ascending	7.5	65	3	2b	0	C2	IIIC	5.6	>1889	No
*Patients with fecal sample only
MA: metachronous adenoma
nMA: none-metachronous adenoma
MT: liver metastasis
Tumor size defination: maximum diameter
No: no adjuvant therapy
C: chemotherapy
R: radiotherapy

## Sheet: Validation cohort
Clinico-pathological Characteristics of Validation Cohort Patients.
		General information			Samples type	Complications			Tumor									Others
Group	ID	Gender	Age	BMI	On-tumor mucosal	Synchronous adenoma	Bowel obstruction	Hematochezia	Primary site	Tumor size (cm)	Distance from anus (cm)	T-stage	N-stage	M-stage	Dukes	Stage	CEA	CA19-9	Adjuvant therapy
MA	CL0M258	F	67	19.052	Y	Y	N	N	sigmoid	5	20	3	0	0	B	IIA	6.28	88.14	C
MA	CL0F293	F	61	23.0112	Y	N	N	N	descending	3	35	3	0	0	B	IIA	9.49	20.58	C
MA	CR0M301	M	45	26.1286	Y	Y	N	Y	transverse	4	67	3	0	0	B	IIA	3.26	0.6	C
MA	R00F314	F	64	25.33	Y	Y	N	Y	rectum	5	10	3	0	0	B	IIA	1.54	12.75	C
MA	CR0M328	M	40	23.3067	Y	N	N	N	ileocecal	2	80	3	1c	0	C2	IIIB	93.31	92.89	C
MA	R00M364	M	64	29.0688	Y	Y	N	Y	rectum	4	8	3	1b	0	C1	IIIB	2.65	9.56	No
MA	W929 CA	F	70	27.6888	Y	Y	N	N	hepatic flexure	4	70	3	0	0	B	IIA	1.48	20.6	C
MA	W950 CA	F	58	25.7117	Y	Y	Y	N	transverse	4	70	2	2b	0	C1	IIIB	0.99	11.8	C
MA	CL0M226	M	63	26.398	Y	N	N	N	rectum	4	20	3	2a	0	C1	IIIB	22.13	82.47	C
MA	CL0M235	M	48	22.8571	Y	Y	N	N	ileocecal	4	80	3	0	0	B	IIA	0.67	29.28	No
MA	CR0F336	F	74	25.3906	Y	N	N	N	transverse	5.5	65	3	0	0	B	IIA	11.94	5.79	No
MA	R00F198	F	67	29.9967	Y	Y	N	Y	rectum	3	6	3	2a	0	C1	IIIB	1.06	46.75	C
MA	R00M176	M	70	23.5294	Y	Y	Y	N	rectum	7	7	3	0	0	B	IIA	2.25	1.41	No
MA	R00M346	M	65	24.4898	Y	N	N	Y	rectum	5	8	3	1a	0	C1	IIIB	3.07	11.27	C
MA	R00M359	M	75	28.0404	Y	Y	N	Y	rectum	6	14	3	1b	0	C1	IIIB	41.2	125.6	C
MA	R00M360	M	58	25.5354	Y	Y	N	Y	rectum	5	10	2	0	0	A	I	5.39	11.72	C
MA	R00M361	M	65	22.4913	Y	Y	N	N	rectum	3	4	2	1b	0	C1	IIIA	1.67	4.11	No
MA	CR0M357	M	53	26.7299	Y	Y	N	N	hepatic flexure	5	68	3	1c	0	C2	IIIB	19.31	7.79	C
MA	CL0F367	F	63	25.0361	Y	Y	Y	N	rectum	4	15	3	0	0	B	IIA	11.96	15.53	C
MA	CROM305	M	58	22.8374	Y	Y	N	N	ileocecal	6	80	2	0	0	A	I	2.36	7.72	No
MA	R00M368	M	45	29.2304	Y	N	N	Y	rectum	5	3	3	1c	0	C2	IIIB	1.77	8.42	No
nMA	R00M306	M	62	23.7654	Y	N	N	N	rectum	3	12	3	2a	0	C1	IIIB	1.36	3.8	C
nMA	R00M352	M	56	26.6436	Y	N	N	Y	rectum	5.5	10	3	1b	0	C1	IIIB	5.22	52.59	C
nMA	CR0M363	M	60	29.3848	Y	N	N	Y	ileocecal	4	75	3	0	0	B	IIA	3.3	32.95	No
nMA	W934 CA	M	68	22.62	Y	Y	N	N	rectum	3.5	10	3	0	0	B	IIA	5.83	4.9	C
nMA	W949 CA	M	68	19.8177	Y	N	N	N	transverse	5	60	3	0	0	B	IIA	4.04	589.7	C
nMA	W933 CA	F	65	22.8624	Y	N	N	N	hepatic flexure	5	77	3	0	0	B	IIA	12.01	71.23	No
nMA	W941 CA	F	51	22.8624	Y	Y	N	N	sigmoid	7	25	3	0	0	B	IIA	5.91	6.9	C
nMA	W944 CA	M	67	23.7812	Y	Y	Y	Y	sigmoid	6	20	3	0	0	B	IIA	4.04	638	C
nMA	CL0F323	F	63	21.3039	Y	Y	N	Y	rectum	6	18	3	0	0	B	IIA	14.93	30.07	C
nMA	CL0M369	M	66	27.6817	Y	N	Y	Y	sigmoid	4.5	23	3	0	0	B	IIA	1.23	34.66	C
nMA	CL0F135	F	49	20	Y	N	N	N	descending	3	30	3	0	0	B	IIA	4.78	0.6	No
nMA	CL0F220	F	74	28.6689	Y	N	N	N	ileocecal	4	80	3	1b	0	C1	IIIB	17.24	54.36	C
nMA	CR0F080	F	57	22.2656	Y	N	N	N	ileocecal	6	80	3	1c	0	C2	IIIB	8.23	8.57	C
nMA	CR0M277	M	76	22.3435	Y	Y	Y	N	ascending	4	70	3	1b	0	C1	IIIB	4.56	32.01	No
nMA	CR0M372	M	65	20.2812	Y	Y	N	N	hepatic flexure	5	80	3	0	0	B	IIA	65.49	11.99	C
nMA	CR0M375	M	39	21.9723	Y	N	N	N	ascending	2	70	3	0	0	B	IIA	2.74	0.6	C
nMA	R00F289	F	80	17.5781	Y	Y	N	Y	rectum	3	3	3	1c	0	C2	IIIB	2.04	12.1	No
nMA	R00M330	M	64	16.0231	Y	Y	N	Y	rectum	3	5	2	0	0	A	I	41.87	9.94	No
nMA	R00M337	M	64	21.4844	Y	N	N	Y	rectum	2	3	3	0	0	B	IIA	53.5	10.07	C
nMA	R00M341	M	56	26.2596	Y	Y	N	Y	rectum	4	5	3	0	0	B	IIA	1.82	3.71	No
nMA	R00M362	M	56	18.7755	Y	Y	N	Y	rectum	4	7	3	2a	0	C1	IIIB	6.52	15.54	No
nMA	R00F104	F	76	26.0262	Y	N	Y	Y	rectum	5	8	3	2b	0	C2	IIIC	3.61	14.92	C
nMA	R00M216	M	51	20.7612	Y	N	N	Y	rectum	2.5	9	3	2b	0	C2	IIIC	33.19	27.47	C
nMA	R00M261	M	63	19.7531	Y	N	N	Y	rectum	5	10	3	0	0	B	IIA	3.1	39.12	No
MA: metachronous adenoma
nMA: none-metachronous adenoma
Tumor size defination: maximum diameter
No: no adjuvant therapy
C: chemotherapy
